# Supplementary material
Source: PubMed Central journal article supplement (PMC5035434)
Supplement: JCM.01204-16_zjm999095179so2.pdf [file JCM.01204-16_zjm999095179so2.pdf]

1 Figure Legend

2 Figure S1. Culture plates for Drone-transported versus Stationary sputum samples.

3 Plates were inoculated with 0.1 McFarland of a clinical MRSA isolate. The 3 columns

4 on the left represent the Drone-transported specimens, and the 3 on the right represent

5 those that were not drone-transported. Chocolate with Bac: Chocolate medium agar

6 with Bacitracin. BAP: Blood Agar Plate. CNA: Colistin Nalidixic Acid Agar.
