# Supplementary material
Source: PubMed Central journal article supplement (PMC5035434)

MRSA 0.1 Spike

UAV Flight

No UAV Flight

MacConkey

Chocolate

Chocolate w Bac

BAP

CNA

MRSASelect

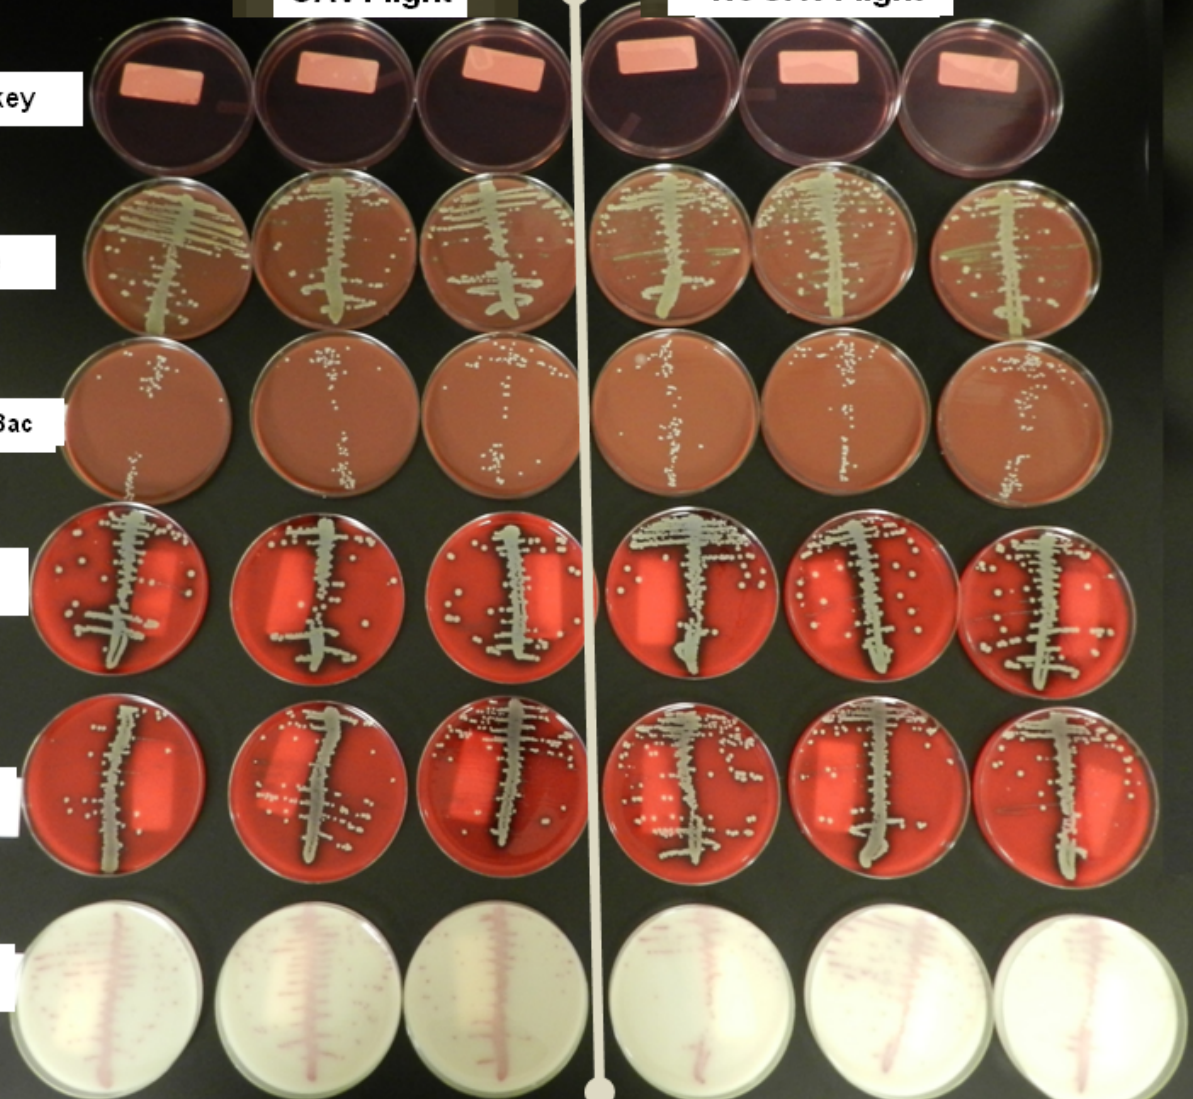

Supplement: JCM.01204-16_zjm999095179so1.pdf [file JCM.01204-16_zjm999095179so1.pdf]
